# Supplementary material for: Multi-scale characterization of symbiont diversity in the pea aphid complex through metagenomic approaches
Source: PubMed Central journal article supplement (PMC6180509; doi:10.1186/s40168-018-0562-9), 2018-10-10

### Neighbor joining

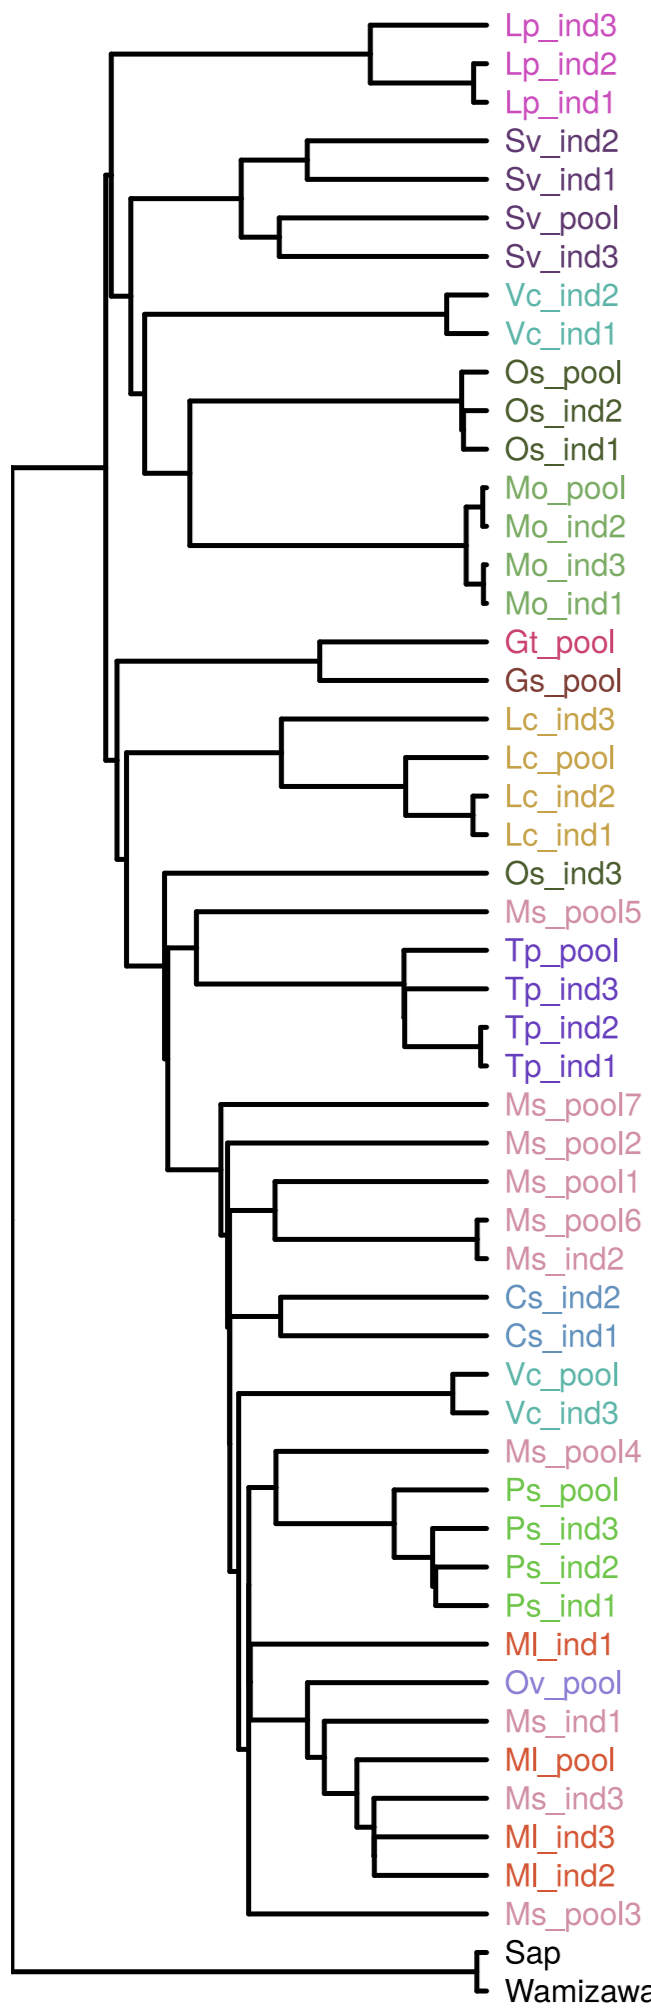

### Buchnera

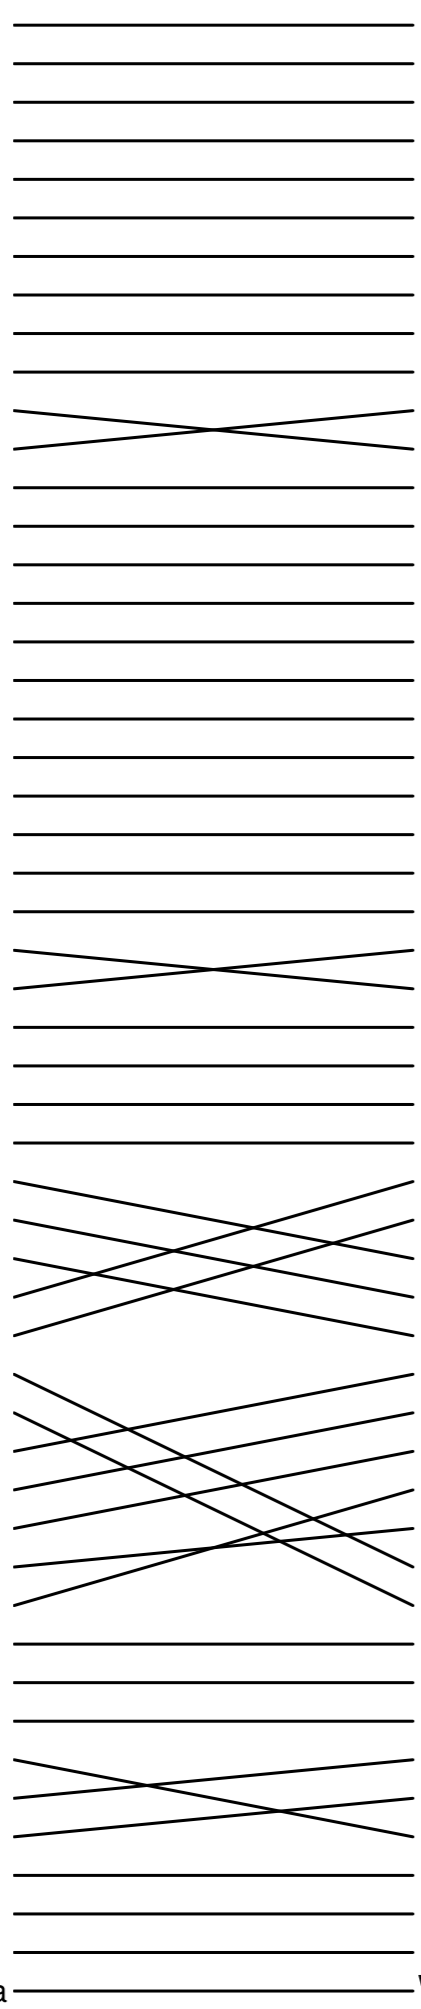

### Gene set phylogenomic

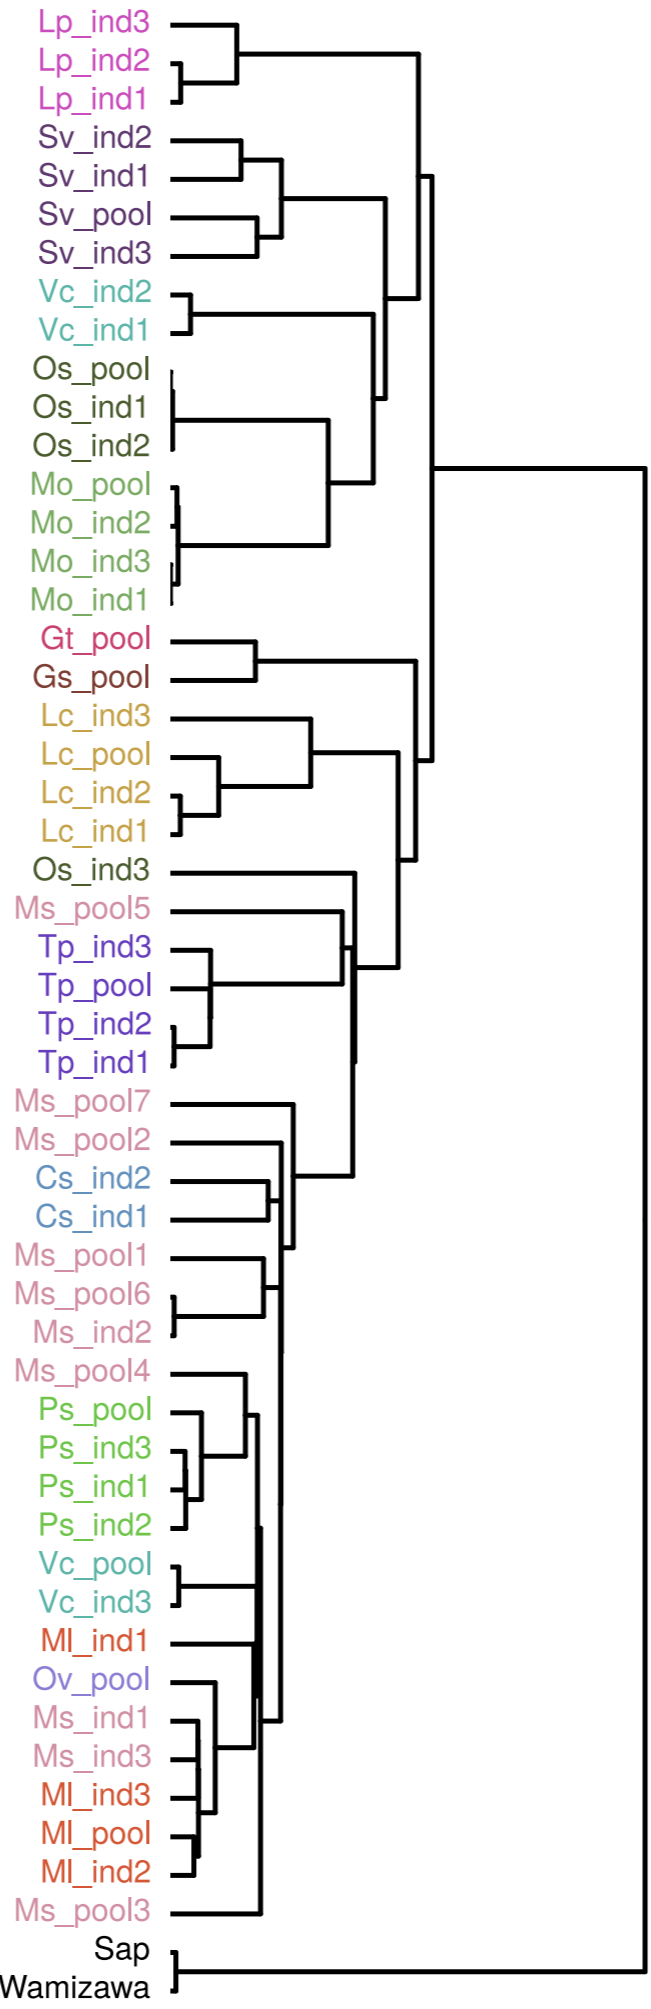

### Gene set phylogeny

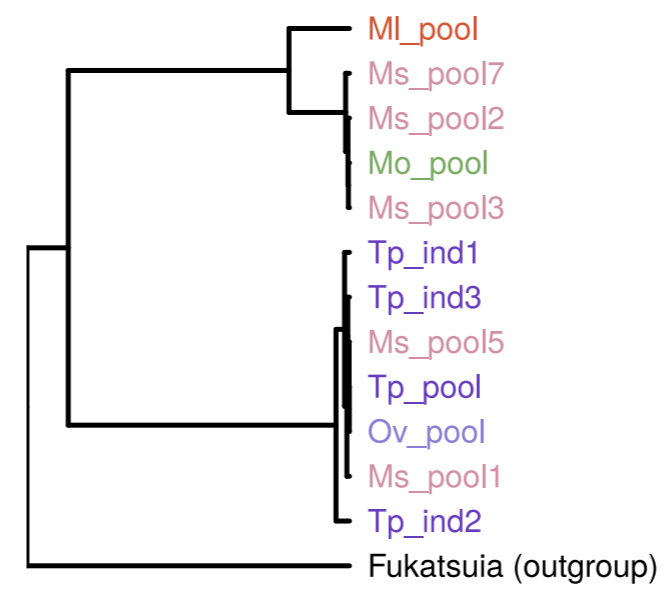

### Regiella

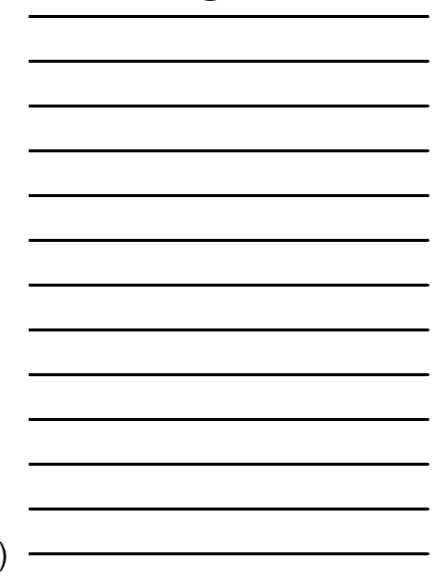

### Neighbor joining

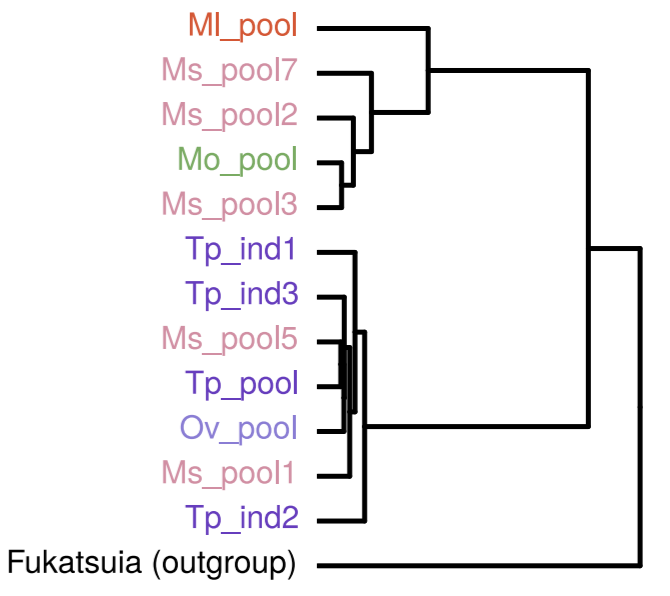

### Gene set phylogeny

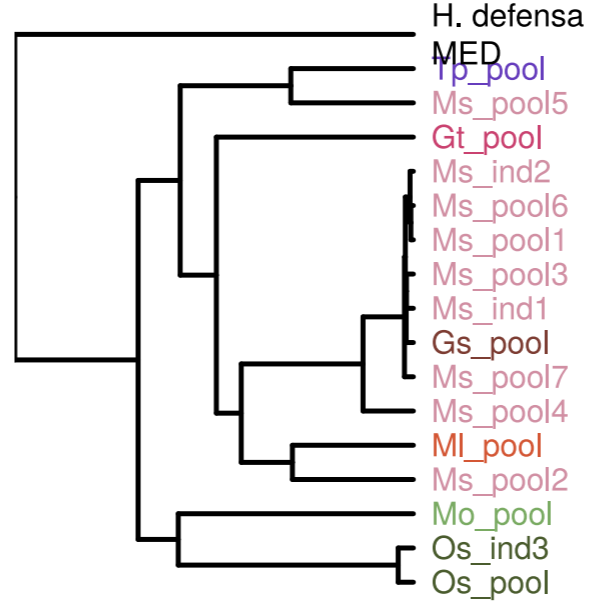

### Hamiltonella

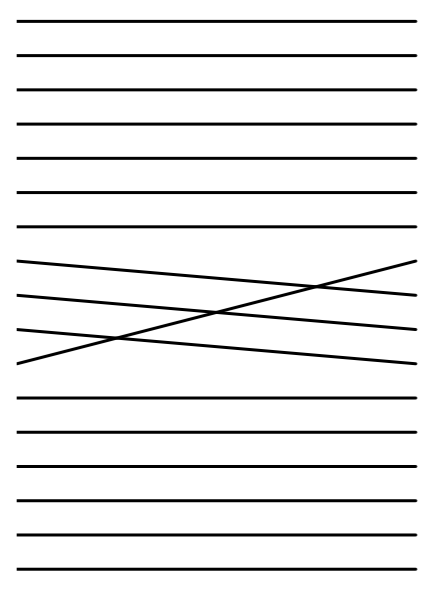

### Neighbor joining

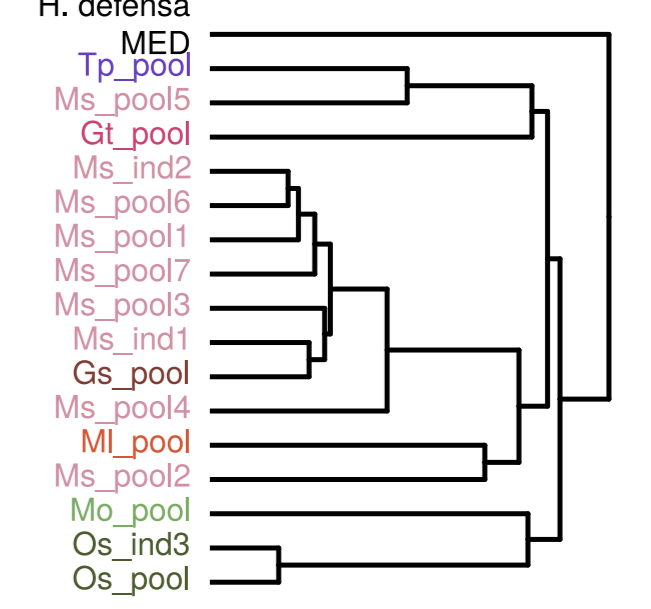

### Gene set phylogeny

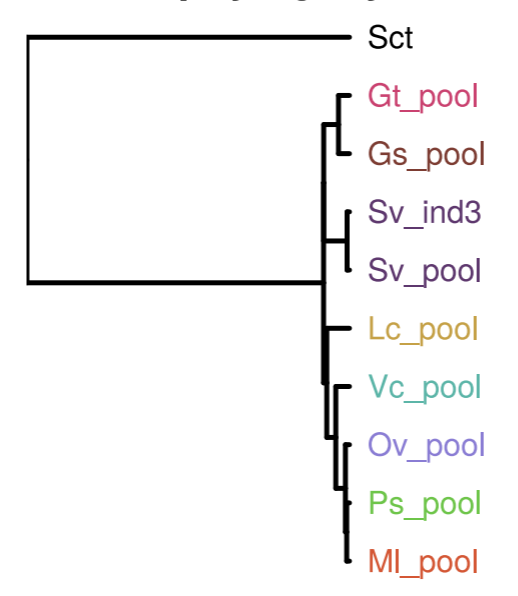

### Serratia

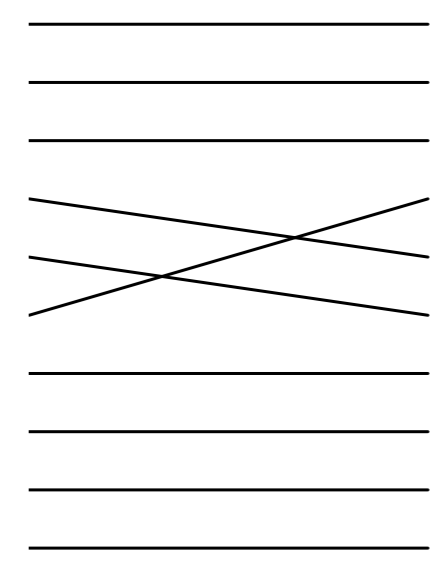

### Neighbor joining

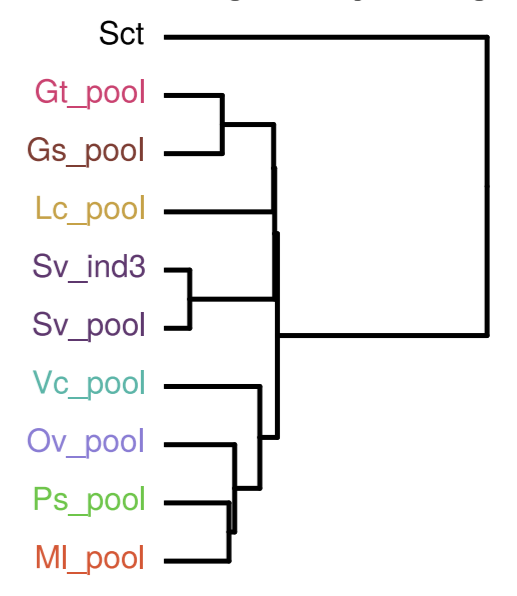

Supplement: 40168_2018_562_MOESM6_ESM.pdf [file 40168_2018_562_MOESM6_ESM.pdf]
